# Supplementary material for: A Model Based on Clusters of Similar Color and NIR to Estimate Oil Content of Single Olives
Source: Preprints.org preprint supplement (doi:10.20944/preprints202012.0405.v1), 2020-12-16
Supplement: Supplementary file 1 [file supplementary]

## Sheet: NIR + Color
	Grupo	Estado	Bolsa	Peso fresco (g)	Peso vaso (g)	Peso vaso c/aceite (g)	% Aceite	Contenido Aceite (g)	Peso Muestra Soxhlet (g)	Peso seco muestra (g)	Peso merma extracción (g)
	29	Con Hueso	113	12.39	75.86	76.85	28.6127	0.99	3.46	5.62	2.51
		Con Hueso	114	14.36	77.01	77.98	30.4075	0.97	3.19	6.44	2.29
		Sin Hueso	115	11.75	74.66	76.23	50	1.57	3.14	4.86	1.46
		Sin Hueso	116	16.91	73.09	74.84	50.2874	1.75	3.48	5.98	1.39
	32	Con Hueso	125	16.81	75.47	76.98	44.6746	1.51	3.38	11.36	1.85
		Con Hueso	126	17.12	75.87	77.15	41.0256	1.28	3.12	11.24	1.79
		Sin Hueso	127	12.48	73.11	75.11	61.5385	2	3.25	8.71	1.09
		Sin Hueso	128	12.41	77.01	78.92	58.7692	1.91	3.25	8.23	1.2
	8	Con Hueso	29	19.14	74.67	75.54	26.5244	0.87	3.28	9.21	2.24
		Con Hueso	30	20.22	75.47	76.31	24.6334	0.84	3.41	10.49	2.33
		Sin Hueso	31	13.96	77.02	78.22	43.6364	1.2	2.75	5.81	1.06
		Sin Hueso	32	17.45	73.1	74.18	34.6154	1.08	3.12	7.99	1.32
	17	Sin Hueso	65	15.85	75.48	76.43	37.1094	0.95	2.56	7.06	1.05
		Sin Hueso	66	17.86	75.86	76.88	33.1169	1.02	3.08	7.93	1.23
		Con Hueso	67	17.84	74.69	75.41	25.8993	0.72	2.78	9.72	1.8
		Con Hueso	68	18.77	75.87	76.58	23.8255	0.71	2.98	11	1.71
	4	Sin Hueso	13	15.27	74.67	75.69	31.2883	1.02	3.26	7.66	1.19
		Sin Hueso	14	14.75	73.11	74.29	38.4365	1.18	3.07	6.9	1.29
		Con Hueso	15	16.62	77.03	77.7	23.1034	0.67	2.9	8.89	1.66
		Con Hueso	16	17.64	75.49	76.21	23.1511	0.72	3.11	9.53	1.78
	3	Con Hueso	9	12.99	74.66	75.78	37.5839	1.12	2.98	6.8	1.62
		Con Hueso	10	13.92	77	78.06	35.3333	1.06	3	7.2	1.67
		Sin Hueso	11	10.69	75.87	77.62	57.1895	1.75	3.06	4.48	0.98
		Sin Hueso	12	10.69	75.85	77.63	56.3291	1.78	3.16	4.35	1.14
	11	Con Hueso	41	14.76	75.46	76.74	40.1254	1.28	3.19	8.67	1.8
		Con Hueso	42	13.33	73.08	74.27	39.6667	1.19	3	8.16	1.76
		Sin Hueso	43	9.98	77.03	78.75	56.9536	1.72	3.02	4.73	1.03
		Sin Hueso	44	8.92	73.1	74.83	61.5658	1.73	2.81	4.06	0.92
	9	Sin Hueso	33	12.3	74.68	76.2	47.7987	1.52	3.18	4.65	1.31
		Sin Hueso	34	10.26	75.47	77	49.6753	1.53	3.08	3.89	1.29
		Con Hueso	35	14.28	75.88	76.82	29.0123	0.94	3.24	7.01	2.12
		Con Hueso	36	12.38	73.1	74.07	31.3916	0.97	3.09	6.44	2.01
	7	Con Hueso	25	13.69	74.68	75.86	37.4603	1.18	3.15	3.15	1.88
		Con Hueso	26	17.56	77	77.97	31.6993	0.97	3.06	9.8	1.69
		Sin Hueso	27	17.31	75.47	76.88	43.3846	1.41	3.25	8.38	1.17
		Sin Hueso	28	16.78	75.85	77.37	45.1039	1.52	3.37	8.42	1.08
	23	Con Hueso	89	14.28	73.09	73.9	25.7962	0.81	3.14	7.08	2.07
		Con Hueso	90	14.44	74.67	75.54	28.2468	0.87	3.08	6.39	2.14
		Sin Hueso	91	8.17	74.69	75.96	46.5201	1.27	2.73	2.86	1.12
		Sin Hueso	92	9.83	77.01	78.24	41.8367	1.23	2.94	3.59	1.32
	10	Con Hueso	37	17.75	73.1	74.13	29.9419	1.03	3.44	9.82	1.95
		Con Hueso	38	15.51	75.48	76.52	32.5	1.04	3.2	8.63	1.82
		Sin Hueso	39	11.22	73.11	74.72	52.1036	1.61	3.09	4.82	0.95
		Sin Hueso	40	10.99	77.02	78.8	58.1699	1.78	3.06	3.85	1.05
	2	Con Hueso	5	18.2	75.88	76.89	31.1728	1.01	3.24	10.03	1.72
		Con Hueso	6	15.02	75.87	76.87	33.0033	1	3.03	7.63	1.74
		Sin Hueso	7	9.24	75.48	77.39	63.8796	1.91	2.99	3.25	0.98
		Sin Hueso	8	9.62	74.68	76.59	64.7458	1.91	2.95	3.35	1
	12	Con Hueso	45	12.2	77	78.21	38.4127	1.21	3.15	8.05	1.86
		Con Hueso	46	11.44	75.85	76.91	34.5277	1.06	3.07	7.36	1.86
		Sin Hueso	47	8.68	73.09	75.11	66.4474	2.02	3.04	4.21	0.95
		Sin Hueso	48	9.06	75.5	77.43	61.465	1.93	3.14	4.77	1.05
	21	Con Hueso	81	14.67	74.66	75.69	31.2121	1.03	3.3	6.67	2.11
		Con Hueso	82	9.43	77.01	77.9	31.5603	0.89	2.82	2.93	1.93
		Sin Hueso	83	12.69	75.85	77.47	52.7687	1.62	3.07	5.75	1.18
		Sin Hueso	84	10.69	73.1	74.83	56.7213	1.73	3.05	3.73	1.35
	27	Con Hueso	105	15.51	74.67	75.52	28.5235	0.85	2.98	7.54	1.98
		Con Hueso	106	17.91	75.87	76.72	28.1457	0.85	3.02	8.58	1.95
		Sin Hueso	107	11.99	74.67	76.35	53.3333	1.68	3.15	4.12	1.35
		Sin Hueso	108	11.17	75.47	76.88	47	1.41	3	3.71	1.24
	13	Con Hueso	49	15.45	73.1	74.05	31.457	0.95	3.02	6.93	2
		Con Hueso	50	13.14	75.47	76.31	27.8146	0.84	3.02	5.98	2.18
		Sin Hueso	51	10.83	77	78.54	51.1628	1.54	3.01	3.35	1.46
		Sin Hueso	52	9.75	75.48	77.09	56.2937	1.61	2.86	3.1	1.22
	16	Con Hueso	61	17.76	73.1	74.28	37.4603	1.18	3.15	9.5	1.06
		Con Hueso	62	16.52	74.67	75.83	38.5382	1.16	3.01	9.25	1.01
		Sin Hueso	63	11.73	77.01	78.83	58.3333	1.82	3.12	5.55	1.6
		Sin Hueso	64	12.6	75.86	77.71	59.8706	1.85	3.09	5.72	1.59
	18	Sin Hueso	69	11.5	77.01	78.67	54.9669	1.66	3.02	3.82	1.29
		Sin Hueso	70	10.16	75.46	77.12	54.7855	1.66	3.03	4.02	1.27
		Con Hueso	71	16.41	73.08	74.03	31.3531	0.95	3.03	7.39	1.97
		Con Hueso	72	16.83	74.66	75.5	25.7669	0.84	3.26	8.53	2
	31	Con Hueso	121	15.49	75.85	76.91	34.9835	1.06	3.03	8.38	1.65
		Con Hueso	122	13.32	74.77	75.89	37.0861	1.12	3.02	6.9	1.72
		Sin Hueso	123	11.6	73.09	75.09	63.8978	2	3.13	4.44	1
		Sin Hueso	124	9.1	75.84	77.95	67.1975	2.11	3.14	3.61	1.03
	20	Con Hueso	77	14.94	75.46	76.36	29.4118	0.9	3.06	6.61	2.12
		Con Hueso	78	18.81	77.01	77.97	30.7692	0.96	3.12	8.71	2.13
		Sin Hueso	79	12.76	75.88	77.48	51.9481	1.6	3.08	3.92	1.37
		Sin Hueso	80	11.61	77	78.7	55.5556	1.7	3.06	3.92	1.37
	19	Con Hueso	73	14.73	74.67	75.96	39.6923	1.29	3.25	6.8	1.94
		Con Hueso	74	15.78	75.46	76.74	41.8301	1.28	3.06	7.52	1.82
		Sin Hueso	75	15.52	73.08	74.96	59.8726	1.88	3.14	6.61	1.08
		Sin Hueso	76	15.54	75.85	77.61	58.4718	1.76	3.01	5.83	1.17
	15	Con Hueso	57	14.11	74.67	75.87	38.7097	1.2	3.1	8.26	1.82
		Con Hueso	58	16.82	77	78.17	38.8704	1.17	3.01	10.01	1.77
		Sin Hueso	59	11.3	77.02	78.98	63.4304	1.96	3.09	4.96	1.04
		Sin Hueso	60	11.51	71.82	73.74	63.7874	1.92	3.01	4.65	1.03
	6	Con Hueso	21	15.38	75.47	76.7	39.6774	1.23	3.1	10.08	1.81
		Con Hueso	22	15.27	73.09	74.32	39.5498	1.23	3.11	9.4	1.81
		Sin Hueso	23	13.97	75.87	77.78	63.4551	1.91	3.01	5.42	1.04
		Sin Hueso	24	13.81	75.48	77.43	63.7255	1.95	3.06	4.8	1.07
	26	Con Hueso	101	14.63	73.09	74.26	38.3607	1.17	3.05	6.71	1.87
		Con Hueso	102	16.27	74.68	75.82	37.6238	1.14	3.03	7.46	1.88
		Sin Hueso	103	15.99	88.08	90.03	64.3564	1.95	3.03	5.74	1.02
		Sin Hueso	104	15.97	88.06	89.94	62.8763	1.88	2.99	5.48	1.04
	28	Con Hueso	109	17.31	86.18	87.06	29.0429	0.88	3.03	7.96	2.1
		Con Hueso	110	18.63	89.71	90.63	29.7735	0.92	3.09	8.5	2.13
		Sin Hueso	111	13.04	75.85	77.43	52.4917	1.58	3.01	4.29	1.45
		Sin Hueso	112	13.42	71.82	73.5	54.3689	1.68	3.09	4.33	1.39
	5	Con Hueso	17	13.71	87.86	89.18	43.7086	1.32	3.02	8.43	1.64
		Con Hueso	18	15.95	89.37	90.68	42.3948	1.31	3.09	11.45	1.76
		Sin Hueso	19	8.67	75.47	77.43	65.5518	1.96	2.99	5.01	0.99
		Sin Hueso	20	8.76	77.02	79.03	65.2597	2.01	3.08	5.04	0.94
	22	Con Hueso	85	14.51	73.08	74.28	39.8671	1.2	3.01	8.42	1.78
		Con Hueso	86	17.13	74.66	75.88	39.8693	1.22	3.06	10.32	1.8
		Sin Hueso	87	12.87	75.86	77.73	61.3115	1.87	3.05	6.63	1.14
		Sin Hueso	88	10.45	71.82	73.78	64.9007	1.96	3.02	6.07	1.01
	25	Con Hueso	97	13.34	89.37	90.49	36.9637	1.12	3.03	6.08	1.88
		Con Hueso	98	15.03	89.71	90.85	37.7483	1.14	3.02	6.77	1.85
		Sin Hueso	99	12.88	74.67	76.6	64.3333	1.93	3	4.26	1.03
		Sin Hueso	100	10.64	77.01	78.98	62.9393	1.97	3.13	3.67	1.12
	14	Con Hueso	53	16.57	86.17	87.47	42.2078	1.3	3.08	10.11	1.75
		Con Hueso	54	17.19	88.08	89.42	43.7908	1.34	3.06	10.19	1.7
		Sin Hueso	55	12.85	75.48	77.32	60.1307	1.84	3.06	5.46	1.18
		Sin Hueso	56	12.61	73.09	75.05	63.8436	1.96	3.07	6.06	1.06
	24	Con Hueso	93	19.04	88.07	89.33	41.1765	1.26	3.06	8.54	1.78
		Con Hueso	94	16.16	87.86	89.05	39.5349	1.19	3.01	7.43	1.78
		Sin Hueso	95	10.93	86.18	88.13	63.3117	1.95	3.08	3.97	1.3
		Sin Hueso	96	11.85	87.86	89.82	65.3333	1.96	3	4.37	1.25
	1	Con Hueso	1	12.56	89.71	90.32	20.2658	0.61	3.01	5.01	2.42
		Con Hueso	2	12.24	89.37	90.16	26.3333	0.79	3	5.15	2.28
		Sin Hueso	3	9.89	88.06	89.23	47.3684	1.17	2.47	2.65	1.38
		Sin Hueso	4	9.29	88.08	89.01	42.4658	0.93	2.19	2.19	1.29
